# Supplementary material
Source: Research Square preprint supplement (doi:10.21203/rs.3.rs-8534257/v1)
Supplement: Supplementary file 1 [file 8f829f2bb62da609b7ea14da.docx]

***Rhizoglomus clarum* inoculation enhances drought tolerance and photosynthetic performance of maize in sterile and natural soils**

Maria Rita da Silva Andrade Leonel1, Niedja Bezerra Costa1, Patrick Costa Silva1, Davi Botello Cutrim2, Sebastião Oliveira Maia Júnior1, Jailma Ribeiro de Andrade1, Camila Pinheiro Nobre1, Thais Roseli Corrêa1, Fabrício de Oliveira Reis1, Weverton Pereira Rodrigues3, Paulo Henrique Aragão Catunda4, Ivaneide de Oliveira Nascimento5, Tiago Massi Ferraz13.

1 Postgraduate in Agricultural Sciences, State University of Maranhão (UEMA), São Luís, MA, 65054-970, Brazil

2 Center for Agricultural Sciences, State University of Maranhão (UEMA), São Luís, MA, 65054-970, Brazil

3 Center for Agricultural Sciences, State University of the Tocantina Region of Maranhão (UEMASUL), Imperatriz, MA, 65900-001, Brazil

4 National Network for Water Resources Management and Regulation (ProfÁgua), State University of Maranhão (UEMA), São Luís, MA, 65054-970, Brazil

5 Postgraduate Studies in Environmental, Sciences State University of the Tocantina Region of Maranhão (UEMASUL), Imperatriz, MA, 65900-001, Brazil

Corresponding author

Niedja Bezerra Costa, email address: [niedjabc@gmail.com](mailto:niedjabc@gmail.com)

**Table** **S1**. Data on photosynthetic pigments and their respective mean comparisons

| Treatments | Chlorophyll *a*  (µmol g⁻¹DM) | Chlorophyll b  (µmol g⁻¹ DM) | Total chlorophyll  (µmol g⁻¹ DM) |
| --- | --- | --- | --- |
| WW_STE | 0.351 ns | 0.200 ns | 1.066 ns |
| WD_STE | 0.378 ns | 0.227 ns | 1.185 ns |
| WW_NAT | 0.390 ns | 0.237 ns | 1.239 ns |
| WD_NAT | 0.384 ns | 0.227 ns | 1.200 ns |
| WW_STE+RHIZO | 0.374 ns | 0.243 ns | 1.273 ns |
| WD_STE+RHIZO | 0.428 ns | 0.300 ns | 1.548 ns |
| WW_NAT+RHIZO | 0.403 ns | 0.264 ns | 1.385 ns |
| WD_NAT+RHIZO | 0.374 ns | 0.230 ns | 1.228 ns |
| C.V. (%) | 11.27 | 12.95 | 12.89 |

WW: well-watered; WD: water deficit; STE+RHIZO: sterile soil inoculated with *Rhizoglomus clarum*; NAT: natural soil; NAT+RHIZO: natural soil inoculated with *R. clarum*. ns: not significant (Tukey test, p < 0.05). Data are means (n = 4). C.V.: coefficients variation

**Table S2**. Data on green intensity index (SPAD) and their respective mean comparisons

| Treatments | Assessments between 8:00-10:00 a.m. during five days of water deficit | | | | |
| --- | --- | --- | --- | --- | --- |
| 1 DAWD | 2 DAWD | 3 DAWD | 4 DAWD | 5 DAWD |
| WW_STE | 43.47 ns | 43.95 ns | 42.95 ns | 41.82 ab | 41.30 ns |
| WD_STE | 42.30 ns | 41.57 ns | 38.27 ns | 37.17 b | 39.47 ns |
| WW_NAT | 45.05 ns | 44.85 ns | 43.87 ns | 44.45 a | 43.50 ns |
| WD_NAT | 41.62 ns | 40.72 ns | 38.40 ns | 40.07 ab | 41.20 ns |
| WW_STE+RHIZO | 40.45 ns | 39.60 ns | 41.10 ns | 41.42 ab | 39.77 ns |
| WD_STE+RHIZO | 43.82 ns | 40.62 ns | 39.00 ns | 38.12 ab | 37.52 ns |
| WW_NAT+RHIZO | 44.27 ns | 43.85 ns | 42.77 ns | 42.02 ab | 40.25 ns |
| WD_NAT+RHIZO | 42.42 ns | 41.75 ns | 39.40 ns | 39.35 ab | 38.37 ns |
| C.V. (%) | 8.78 | 9.06 | 9.38 % | 7.22 % | 9.39 % |
| Treatments | Assessments between 12:00-2:00 p.m. during five days of water deficit | | | | |
| 1 DAWD | 2 DAWD | 3 DAWD | 4 DAWD | 5 DAWD |
| WW_STE | 40.27 ns | 38.90 ns | 38.90 ns | 37.95 ns | 38.92 ns |
| WD_STE | 42.47 ns | 41.50 ns | 41.72 ns | 41.75 ns | 39.85 ns |
| WW_NAT | 44.37 ns | 44.02 ns | 43.12 ns | 43.70 ns | 45.50 ns |
| WD_NAT | 43.22 ns | 41.47 ns | 42.10 ns | 39.87 ns | 40.90 ns |
| WW_STE+RHIZO | 40.20 ns | 40.07 ns | 41.22 ns | 39.75 ns | 39.35 ns |
| WD_STE+RHIZO | 41.00 ns | 39.60 ns | 38.60 ns | 38.90 ns | 41.27 ns |
| WW_NAT+RHIZO | 43.95 ns | 42.70 ns | 41.57 ns | 41.40 ns | 41.30 ns |
| WD_NAT+RHIZO | 42.60 ns | 39.75 ns | 40.30 ns | 38.77 ns | 39.00 ns |
| C.V. (%) | 8.05 | 7.94 | 7.03 | 7.58 | 9.52 |

DAWD: days after water deficit; WW: well-watered; WD: water deficit; STE+RHIZO: sterile soil inoculated with *Rhizoglomus clarum*; NAT: natural soil; NAT+RHIZO: natural soil inoculated with *R. clarum*. ns: not significant (Tukey test, p < 0.05). Data are means (n = 4). C.V.: coefficients variation
